# Supplementary material
Source: publisher site journal article supplement (https://www.spandidos-publications.com/8570/downloadSupplementary)
Supplement: Supplementary file 1 [file downloadSupplementary]

Table SI. Levels of evidence and key limitations of epigenetic studies in cutaneous fibrosis.

| Study type/approach                        | Typical model (sample size)                                     | Level of evidence <sup>a</sup>             | Key limitations                                                                                                         | (Ref.)     |
|--------------------------------------------|-----------------------------------------------------------------|--------------------------------------------|-------------------------------------------------------------------------------------------------------------------------|------------|
| Human observational bulk omics             | Human scar tissue (n=10-50)                                     | II; translational evidence                 | Bulk-tissue analysis masks cellular heterogeneity; correlative; population-specific biases.                             | (8,33-35)  |
| Human single-cell sequencing/spatial omics | Human tissue (3-10 samples, each comprising thousands of cells) | II-III; exploratory-translational evidence | Very small cohort sizes; high cost; technical noise; limited functional follow-up.                                      | (28-30)    |
| <i>In vitro</i> functional validation      | Cultured human fibroblasts (n=3-6 biological replicates)        | III; pre-clinical evidence                 | Simplified 2D culture lacks tissue context; potential off-target effects of transfection or editing; donor variability. | (18,36-38) |
| Animal model interventions                 | Rodent or rabbit models (n=5-10 per group)                      | III; pre-clinical evidence                 | Species differences in skin biology and healing; small sample sizes; short follow-up.                                   | (12,36)    |
| First-in-human interventions               | Small patient cohorts (n<50)                                    | IIa; early-phase clinical evidence         | Lack of randomization or placebo in some studies; subjective or non-standardized endpoints; short duration.             | (11)       |
| Bioinformatic prediction and               | Public datasets or <i>in silico</i> analysis                    | IV; hypothesis-generating evidence         | Requires experimental validation; high false-positive rate.                                                             | (39,40)    |

|                  |  |  |  |  |
|------------------|--|--|--|--|
| network analysis |  |  |  |  |
|------------------|--|--|--|--|

<sup>a</sup>Level of evidence: I, large, prospective randomized controlled trials; II, smaller cohort/translational studies (IIa, with intervention; IIb, observational); III, *In vitro* or animal model studies; IV, bioinformatics/preliminary data. Classification adapted from levels for therapeutic and mechanistic evidence.

Table SII. DNA-methylation drivers of cutaneous fibrosis.

| First author, year             | Model/tissue (n)                                               | Key method                                      | Major methyl-locus targets      | Direction of change                                                                                        | Functional read-out                                    | Ref. |
|--------------------------------|----------------------------------------------------------------|-------------------------------------------------|---------------------------------|------------------------------------------------------------------------------------------------------------|--------------------------------------------------------|------|
| Sharma <i>et al</i> , 2016     | Rabbit glaucoma surgery                                        | 5-aza-2'-deoxycytidine, sub-conj administration | Global                          | DNA hypomethylation (demethylation)                                                                        | Collagen deposition reduced by 45% vs. vehicle control | (11) |
| Jones <i>et al</i> , 2015      | Keloid, multi-ethnic (28)                                      | Illumina 450K EWAS                              | COL1A1, COL3A1, RASAL1 and PTEN | Hypomethylation enriched in collagen-related genes; hypermethylation of anti-fibrotic genes (RASAL1, PTEN) | First keloid methylome map                             | (34) |
| Alghamdi <i>et al</i> , 2020   | Keloid, recruited from Western Australia and Saudi Arabia (48) | Illumina EPIC 850K                              | 3,214 DMCs <sup>a</sup>         | Same directional $\Delta\beta \sim 0.20$                                                                   | Validated platform concordance                         | (35) |
| Prabsattru <i>et al</i> , 2025 | Keloid, Thai (35)                                              | Bisulfite-pyroseq                               | LINE-1 methylation              | $\Delta\beta$ 0.18 vs. normal tissues                                                                      | Predicts recurrence $r=0.62$                           | (36) |
| Stevenson <i>et al</i> , 2022  | Keloid fibroblasts (12)                                        | WGBS and RNA-seq                                | FOXF2 promoter                  | Hypermethylation results in FOXF2 downregulation                                                           | FOXF2 downregulation drives collagen upregulation      | (42) |

|                                |                                                   |                     |                         |                                              |                                               |      |
|--------------------------------|---------------------------------------------------|---------------------|-------------------------|----------------------------------------------|-----------------------------------------------|------|
| Liu <i>et al</i> , 2019        | Human dermal fibroblasts under hypoxic conditions | hMeDIP-qPCR         | TGF- $\beta$ 1 promoter | 5-hydroxymethylcytosine downregulated by 40% | TGF- $\beta$ 1 upregulated; reversed by Vit-C | (44) |
| Niu and Tan, 2023              | Keloid explants (8)                               | TET2 overexpression | COL1A2 enhancer         | 5-hydroxymethylcytosine upregulated          | Collagen downregulated by 31%                 | (45) |
| Meevassana <i>et al</i> , 2022 | Burn scars vs. normal tissue (20)                 | Bisulfite-PCRs      | Alu and LINE-1 repeats  | Hypermethylation of 8-12%                    | First repeat-element scan                     | (46) |

<sup>a</sup>DMCs showed a 62% overlap with the results of the study reported by Jones *et al* (33). EWAS, epigenome-wide association study; DMCs, differentially methylated CpGs; WGBS, whole-genome bisulfite sequencing; hMeDIP-qPCR, hydroxymethylated DNA immunoprecipitation-quantitative PCR;  $\Delta\beta$ , difference in methylation beta-values; RNA-seq, RNA-sequencing; 5-hydroxymethylcytosine, a stable DNA modification generated by Ten-eleven translocation-mediated oxidation of 5-methylcytosine; Vit-C, vitamin C (ascorbic acid); Alu, A short interspersed nuclear element; LINE-1, long interspersed nuclear element-1; sub-conj, subconjunctival (route of administration); COL3A1, type III collagen  $\alpha$ 1 chain; RASAL1, RAS protein activator-like 1; PTEN, phosphatase and tensin homolog.

Table SIII. Non-coding RNA networks in scar pathogenesis

| First author, year        | RNA class | Model/tissue (n)    | Key RNAs                     | Expression change                                                      | Functional phenotype                                                                                                                                  | Ref. |
|---------------------------|-----------|---------------------|------------------------------|------------------------------------------------------------------------|-------------------------------------------------------------------------------------------------------------------------------------------------------|------|
| Wang <i>et al</i> , 2025  | m6A-miRNA | HTSs (6)            | pri-miR-31 (METTL3-mediated) | m6A hypermethylation of pri-miR-31                                     | METTL3-mediated m6A modification of pri-miR-31 promoted mature miR-31-5p downregulation, thereby derepressing ZBTB20 to promote collagen synthesis    | (13) |
| Li <i>et al</i> , 2015    | miRNA     | HTS fibroblasts (3) | miR-10a and miR-181c         | Differentially expressed (miR-181c upregulated; miR-10a downregulated) | miR-181c targets uPA; miR-10a targets PAI-1; miR-181c knockdown or miR-10a overexpression increases MMP1 and decreases COL1A1                         | (37) |
| Li <i>et al</i> , 2016    | miRNA     | HTSs (4)            | miR-21                       | Upregulated                                                            | miR-21 promoted TGF- $\beta$ 1-induced fibroproliferative expression by repressing Smad7 expression in vitro; PTEN was not investigated in this study | (38) |
| Jin <i>et al</i> , 2019   | lncRNA    | Keloid (6)          | HOXA11-AS                    | Upregulated                                                            | Sponges miR-124-3p, leading to Smad5 upregulation                                                                                                     | (39) |
| Zhang <i>et al</i> , 2020 | circRNA   | Keloid (6)          | circPTK2 and circFNDC3B      | Upregulated                                                            | Sponges miR-19a-3p and miR-29b                                                                                                                        | (40) |

|                             |       |                          |                     |               |                                                                                                |      |
|-----------------------------|-------|--------------------------|---------------------|---------------|------------------------------------------------------------------------------------------------|------|
| Mu <i>et al</i> , 2016      | miRNA | HTSs (5)                 | miR-143-3p          | Upregulated   | CTGF upregulation caused an upregulation in Akt/mTOR signaling                                 | (47) |
| Shimada <i>et al</i> , 2020 | miRNA | SSc fibroblasts (6)      | miR-29 family       | Downregulated | MMP1 was upregulated; collagen-I was downregulated                                             | (48) |
| Zhou <i>et al</i> , 2015    | miRNA | HTSs (8)                 | miR-21 and miR-200b | Upregulated   | Pro-fibrotic potential via TGF- $\beta$ /miR-21/Smad7 and TGF- $\beta$ /miR-200b/Zeb1 pathways | (49) |
| Liu <i>et al</i> , 2016     | miRNA | HTSs (6)                 | miR-21              | Upregulated   | Smad7 signaling increased                                                                      | (50) |
| Yan <i>et al</i> , 2016     | miRNA | Keloid keratinocytes (4) | miR-21              | Upregulated   | Stemness and EMT                                                                               | (51) |
| Zhou <i>et al</i> , 2017    | miRNA | Keloid (7)               | miR-21              | Upregulated   | Smad7 was downregulated; collagen was upregulated                                              | (52) |
| Yan <i>et al</i> , 2020     | miRNA | Keloid (5)               | miR-21              | Upregulated   | Autophagy and migration increased                                                              | (53) |
| Yan <i>et al</i> , 2016     | miRNA | Mouse scleroderma        | miR-155             | Upregulated   | CTGF was upregulated; inflammation                                                             | (54) |
| Li <i>et al</i> , 2024      | miRNA | HTSs (6)                 | miR-155             | Upregulated   | $\alpha$ -SMA was upregulated via AZGP1 downregulation                                         | (55) |

|                          |                |            |              |               |                                                        |      |
|--------------------------|----------------|------------|--------------|---------------|--------------------------------------------------------|------|
| Gras <i>et al</i> , 2015 | miRNA          | HTSs (4)   | miR-145      | Upregulated   | Myofibroblast conversion enhanced                      | (56) |
| Wang <i>et al</i> , 2017 | miRNA          | HTSs (5)   | miR-31-5p    | Upregulated   | RhoA was upregulated; stress-fiber formation increased | (57) |
| Shi <i>et al</i> , 2018  | miRNA          | Keloid (6) | miR-203      | Downregulated | EGR1/FGF2 were upregulated; proliferation increased    | (58) |
| Pang <i>et al</i> , 2019 | miRNA          | Keloid (4) | miR-152-5p   | Downregulated | Smad3 was upregulated; apoptosis decreased             | (59) |
| Xu and Jiang, 2021       | miRNA          | Keloid (5) | miR-194-5p   | Downregulated | NR2F2 was upregulated; fibrosis increased              | (60) |
| Xu <i>et al</i> , 2024   | exosomal miRNA | Mouse burn | miR-194      | Downregulated | TGF- $\beta$ 1 was upregulated; fibrosis increased     | (61) |
| Xu <i>et al</i> , 2021   | lncRNA         | Keloid (5) | H19          | Upregulated   | Sponges miR-769-5p, leading to EIF3A upregulation      | (62) |
| Tu <i>et al</i> , 2018   | lncRNA         | HTSs (3)   | TUG1, MALAT1 | Upregulated   | Pro-fibrotic effects                                   | (63) |
| Li <i>et al</i> , 2021   | lncRNA         | HTSs (4)   | LINC00173    | Upregulated   | $\beta$ -catenin was upregulated; apoptosis decreased  | (64) |
| Wu <i>et al</i> , 2022   | lncRNA         | HTSs (5)   | FPASL        | Downregulated | DNMT3B was upregulated; fibroblast activity increased  | (65) |

|                           |             |            |                             |                                                            |                                                                                         |      |
|---------------------------|-------------|------------|-----------------------------|------------------------------------------------------------|-----------------------------------------------------------------------------------------|------|
| Li <i>et al</i> , 2021    | lncRNA      | HTSs (4)   | COL1A2-AS1                  | Upregulated (induced apoptosis in normal skin fibroblasts) | p-Smad3 was repressed and $\beta$ -catenin was promoted, leading to increased apoptosis | (66) |
| Li <i>et al</i> , 2021    | lncRNA      | HTSs (5)   | TUG1                        | Upregulated                                                | TAK1/YAP/TAZ signaling activation via miR-27b-3p sponging                               | (67) |
| Zhang <i>et al</i> , 2021 | circRNA     | Keloid (4) | Global circrome             | N/A                                                        | 91 DE-circRNAs were catalogued                                                          | (68) |
| Lv <i>et al</i> , 2021    | circRNA     | Keloid (5) | circCOL5A1                  | Upregulated                                                | Sponges miR-7-5p, upregulates Epac1, and activates PI3K/Akt signaling                   | (69) |
| Zhu <i>et al</i> , 2022   | circRNA     | Keloid (4) | circ_0057452                | Upregulated                                                | miR-7-5 sponging increased GAB1 axis activity                                           | (70) |
| Xu <i>et al</i> , 2024    | m6A-circRNA | HTSs (5)   | circGLIS3 (ALKBH5-mediated) | Downregulated 5hmC                                         | Demethylation resulted in downregulation of ECM deposition                              | (71) |

This table catalogs the diverse ncRNA species implicated in scar pathogenesis, illustrating their roles in forming interconnected regulatory circuits that sustain fibroblast activation and collagen deposition.  $\alpha$ -SMA,  $\alpha$ -smooth muscle actin; Akt, protein kinase B; ALKBH5,  $\alpha$ -ketoglutarate-dependent dioxygenase alkB homolog 5; AZGP1, zinc- $\alpha$ -2-glycoprotein 1; circRNA, circular RNA; CTGF, connective tissue growth factor; DE, differentially expressed; DNMT3B, DNA methyltransferase 3B; ECM, extracellular matrix; EGR1, early growth response 1; EIF3A, eukaryotic translation initiation factor 3 subunit A; EMT, epithelial-mesenchymal transition; Epac1, exchange protein directly activated by cAMP 1; FGF2, fibroblast growth factor 2; FPASL, FPASL long non-coding RNA; HTS, hypertrophic scar; lncRNA, long non-coding RNA; m6A, N6-methyladenosine; MALAT1, metastasis-associated lung adenocarcinoma transcript 1; METTL3, methyltransferase-like 3; miRNA, microRNA;

MMP1, matrix metalloproteinase 1; MN, microneedle; MOF, metal-organic framework; mTOR, mechanistic target of rapamycin; NR2F2, nuclear receptor subfamily 2 group F member 2; PAI-1, plasminogen activator inhibitor 1; PI3K, phosphoinositide 3-kinase; PTEN, phosphatase and tensin homolog; RhoA, Ras homolog family member A; RNA, ribonucleic acid; Smad, small mothers against decapentaplegic; SSc, systemic sclerosis; TAK1, transforming growth factor  $\beta$ -activated kinase 1; TAZ, tafazzin; TGF- $\beta$ , transforming growth factor- $\beta$ ; TUG1, taurine-upregulated gene 1; uPA, urokinase plasminogen activator; YAP, Yes-associated protein.

Table SIV. Clinical translation studies targeting epigenetic drivers of cutaneous fibrosis.

| First author, year        | Experimental design/model (n) | Intervention and dose                                    | Primary efficacy endpoint                                                                     | Key safety/PD metric                                                           | Duration of follow-up | Ref.  |
|---------------------------|-------------------------------|----------------------------------------------------------|-----------------------------------------------------------------------------------------------|--------------------------------------------------------------------------------|-----------------------|-------|
| Yeo <i>et al</i> , 2017   | Rabbit ear scar (8)           | Single 0.3 mg 5-fluorouracil MN shot                     | Scar height reduced by 28% comparable with daily intra-lesional 5-fluorouracil administration | Plasma below LOD; no epidermal atrophy                                         | 28 days               | (102) |
| Yang <i>et al</i> , 2021  | Rabbit ear scar (10)          | 5-fluorouracil 0.4 mg + triamcinolone 0.2 mg biphasic MN | Scar height reduced 38% versus 22% reduction following monotherapies                          | TGF- $\beta$ 1 protein was downregulated 34% in dermis                         | 28 days               | (103) |
| Zhang <i>et al</i> , 2022 | Rabbit ear scar (10)          | Single application of 0.5 mg SR11302 (JUN inhibitor) MN  | Scar height reduced 48% versus non-separating MNs                                             | Tip detachment only under pH<6.5 and ROS>500 $\mu$ M; no unwounded-skin injury | 28 days               | (104) |
| Chien <i>et al</i> , 2022 | Rabbit ear scar (12)          | Single administration of 1 mg tranilast-loaded MNs       | Scar height reduced 42% versus 22% for daily gel application over 21 days                     | Plasma <5 ng ml <sup>-1</sup> ; zero-order kinetics observed for 14 days       | 42 days               | (105) |
| Chen <i>et al</i> , 2023  | Rabbit ear scar (10)          | Porphyrin-MOFs + 660 nm illumination, 10-min exposure    | Scar height reduced 46% versus dark control                                                   | VEGFA was downregulated by 52%; $\alpha$ -SMA was downregulated by 38%         | 28 days               | (106) |
| Chen <i>et al</i>         | Rabbit ear scar               | 5-aminolevulinic acid-                                   | Scar height reduced 52%; no                                                                   | Ferroptosis in fibroblasts;                                                    | 56 days               | (107) |

|                         |                        |                                                           |                                                                          |                                                                                   |         |       |
|-------------------------|------------------------|-----------------------------------------------------------|--------------------------------------------------------------------------|-----------------------------------------------------------------------------------|---------|-------|
| <i>al, 2025</i>         | (9)                    | loaded MOF-MNs +<br>endogenous ROS                        | rebound at week 8                                                        | keratinocytes spared                                                              |         |       |
| Yuan <i>et al, 2021</i> | Rabbit ear scar<br>(8) | miR-29a-MSC-exo,<br>1x10 <sup>9</sup> per MN              | Scar height reduced 35% versus<br>control MN                             | p-Smad3 was downregulated<br>by 44%; 80% of exosomes<br>were released within 48 h | 28 days | (108) |
| Zhen <i>et al, 2025</i> | Pig HTSs (6)           | miR-200s-EpiSC-exo +<br>$\alpha$ -TGF- $\beta$ antibodies | 1.2 mm flattening versus 0.6<br>mm after treatment with exo-<br>only MNs | Collagen-I mRNA was<br>downregulated by 50% at<br>week 12                         | 84 days | (72)  |

MN, microneedle; LOD, limit of detection; TGF- $\beta$ 1, transforming growth factor- $\beta$ 1; ROS, reactive oxygen species; VEGFA, vascular endothelial growth factor A;  $\alpha$ -SMA,  $\alpha$ -smooth muscle actin; MSC, mesenchymal stem cell; EpiSC, epidermal stem cell; exo, exosome; MOF, metal-organic framework; PDT, photodynamic therapy; HTS, hypertrophic scar.
